# Supplementary material for: Impact of COVID-19 on Hospital Admissions and Healthcare Quality Indicators in Non-COVID Patients: A Retrospective Study of the First COVID-19 Year in a University Hospital in Spain
Source: J Clin Med. 2022 Mar 22;11(7):1752. doi: 10.3390/jcm11071752 (PMC8999691; doi:10.3390/jcm11071752)
Supplement: Supplementary file 1 [file jcm-11-01752-s001.zip › jcm-1610281-supplementary.pdf]

**Table S1. Comparison of admissions, complications, mortality, readmissions and severity between pre-COVID and COVID period by Diagnosis Related Group (DRG)**

| MDC                                          | GRD                                                                     | Admissions<br>RR (IC95%) | Complications<br>RR (IC95%) | In-hospital<br>mortality<br>RR (IC95%) | Readmissions<br>RR (IC95%) | Severity<br>RR (IC95%) |
|----------------------------------------------|-------------------------------------------------------------------------|--------------------------|-----------------------------|----------------------------------------|----------------------------|------------------------|
| Diseases and disorders of the nervous system | Craniotomy for trauma                                                   | 0.94 (0.36;2.48)         | 1.08 (0.4;2.92)             | 0.43 (0.06;2.95)                       | -                          | 4.33 (0.48;38.99)      |
| Diseases and disorders of the nervous system | Viral meningitis                                                        | 0.84 (0.6;1.17)          | 1.04 (0.58;1.88)            | 0.61 (0.26;1.39)                       | 1.62 (0.28;9.39)           | 0.94 (0.42;2.12)       |
| Diseases and disorders of the nervous system | Hypertensive encephalopathies                                           | 0.36 (0.11;1.23)         | -                           | -                                      | -                          | 5.67 (0.47;68.03)      |
| Diseases and disorders of the nervous system | Coma and stupor of non-traumatic origin                                 | 2.04 (0.66;6.32)         | -                           | -                                      | -                          | -                      |
| Diseases and disorders of the nervous system | Extracranial vascular procedures                                        | 0.92 (0.65;1.3)          | 1.25 (0.6;2.61)             | 0.74 (0.29;1.91)                       | 2.22 (0.14;34.74)          | 0.81 (0.27;2.4)        |
| Diseases and disorders of the nervous system | Other nervous system and related procedures                             | 1.02 (0.41;2.53)         | -                           | -                                      | -                          | -                      |
| Diseases and disorders of the nervous system | Spinal disorders and injuries                                           | 0.58 (0.12;2.8)          | -                           | -                                      | -                          | -                      |
| Diseases and disorders of the nervous system | Neoplasms of the nervous system                                         | 1.18 (0.86;1.6)          | -                           | 0.69 (0.23;2.12)                       | -                          | 0.35 (0.08;1.53)       |
| Diseases and disorders of the nervous system | Degenerative disorders of the nervous system, except multiple sclerosis | 1.31 (0.96;1.79)         | -                           | 1.24 (0.35;4.46)                       | -                          | 2.07 (0.48;8.96)       |
| Diseases and disorders of the nervous system | Multiple sclerosis and cerebellar ataxia                                | 1.02 (0.31;3.39)         | -                           | -                                      | -                          | -                      |
| Diseases and disorders of the nervous system | Intracranial haemorrhage                                                | 0.77 (0.56;1.04)         | -                           | 1.12 (0.63;1.97)                       | 2.66 (0.17;41.82)          | 0.94 (0.39;2.26)       |
| Diseases and disorders of the nervous system | Stroke and precerebral occlusions with infarction                       | 0.77 (0.66;0.9)          | 2.36 (0.92;6.05)            | 1.12 (0.67;1.87)                       | 1.14 (0.3;4.37)            | 1.09 (0.46;2.6)        |
| Diseases and disorders of the nervous system | Non-specific ACVA and precerebral occlusions without infarction         | 0.46 (0.23;0.92)         | -                           | -                                      | 4.4 (0.3;64.53)            | -                      |
| Diseases and disorders of the nervous system | Transient ischemic attack                                               | 0.65 (0.45;0.96)         | -                           | -                                      | -                          | -                      |
| Diseases and disorders of the nervous system | Cranial, peripheral and autonomic nerve disorders                       | 1.1 (0.65;1.87)          | -                           | -                                      | -                          | -                      |
| Diseases and disorders of the nervous system | Bacterial and tuberculous infections of the nervous system              | 0.24 (0.07;0.78)         | -                           | -                                      | -                          | 1.24 (0.22;6.92)       |
| Diseases and disorders of the nervous system | Non-bacterial infections of the nervous system except viral meningitis  | 1.36 (0.69;2.67)         | -                           | -                                      | -                          | 0.75 (0.07;7.51)       |

|                                                           |                                                                                                    |                  |                   |                  |                  |                  |
|-----------------------------------------------------------|----------------------------------------------------------------------------------------------------|------------------|-------------------|------------------|------------------|------------------|
| Diseases and disorders of the nervous system              | Viral meningitis                                                                                   | 0.29 (0.04;2.37) | -                 | -                | -                | -                |
| Diseases and disorders of the nervous system              | Coma and non-traumatic stupor                                                                      | 0.89 (0.5;1.57)  | -                 | 0.57 (0.07;4.76) | -                | -                |
| Diseases and disorders of the nervous system              | Convulsions                                                                                        | 0.68 (0.52;0.88) | 0.86 (0.18;4.04)  | 6 (1.12;32.09)   | 1.5 (0.28;8.02)  | 2.4 (0.66;8.7)   |
| Diseases and disorders of the nervous system              | Migraine and other headaches                                                                       | 0.61 (0.32;1.17) | -                 | -                | -                | -                |
| Diseases and disorders of the nervous system              | Head injury with coma >1h or haemorrhage                                                           | 0.82 (0.63;1.07) | 4.95 (0.46;53.79) | 2.17 (0.81;5.77) | 0.49 (0.06;4.17) | 0.55 (0.12;2.49) |
| Diseases and disorders of the nervous system              | Cranial fracture and complicated intracranial injury, coma < 1h or no coma                         | 0.51 (0.06;4.56) | -                 | -                | -                | -                |
| Diseases and disorders of the nervous system              | Concussion, uncomplicated intracranial injury, coma <1 hr or without coma                          | 0.99 (0.76;1.3)  | -                 | 2.05 (0.42;9.93) | -                | 4.1 (0.38;44.55) |
| Diseases and disorders of the nervous system              | Other diseases of the nervous system                                                               | 1.36 (1.03;1.8)  | -                 | 1 (0.17;5.83)    | -                | 0.75 (0.14;3.99) |
| Diseases and disorders of the nervous system              | Tonsillectomy and/or adenoidectomy only, age >= 18,                                                | 0.82 (0.16;4.2)  | -                 | 1.67 (0.81;3.41) | -                | 2.5 (0.85;7.31)  |
| Diseases and disorders of the eye                         | Lens procedures, except orbit                                                                      | 0.82 (0.26;2.6)  | -                 | -                | -                | -                |
| Diseases and disorders of the eye                         | Eye diseases, except major infections                                                              | 0.45 (0.19;1.1)  | -                 | -                | -                | -                |
| Diseases and disorders of the ear, nose, mouth and throat | Major cranial/facial bone procedures                                                               | -                | -                 | -                | -                | -                |
| Diseases and disorders of the ear, nose, mouth and throat | Other major head and neck procedures                                                               | -                | -                 | -                | -                | -                |
| Diseases and disorders of the ear, nose, mouth and throat | Facial bone procedures except major cranial/facial bone proc, Major cranial/facial bone procedures | 1.48 (0.6;3.69)  | -                 | -                | -                | -                |
| Diseases and disorders of the ear, nose, mouth and throat | Tonsillectomy and adenoidectomy                                                                    | -                | -                 | -                | -                | -                |
| Diseases and disorders of the ear, nose, mouth and throat | Other ear, nose, mouth and throat procedures                                                       | 0.73 (0.26;2.02) | -                 | -                | -                | 0.93 (0.12;7.03) |
| Diseases and disorders of the ear, nose, mouth and throat | Head trauma with deep coma                                                                         | -                | -                 | -                | -                | -                |
| Diseases and disorders of the ear, nose, mouth and throat | Ear, nose, mouth, throat and cranial/facial neoplasms                                              | 1.96 (1.15;3.36) | -                 | 0.69 (0.22;2.18) | -                | 0.78 (0.19;3.15) |
| Diseases and disorders of the ear, nose, mouth and throat | Balance disorders                                                                                  | 1.07 (0.62;1.84) | -                 | -                | 1.9 (0.13;28.8)  | -                |
| Diseases and disorders of the ear, nose, mouth and throat | Upper respiratory infections                                                                       | 0.33 (0.23;0.48) | -                 | -                | -                | 0.87 (0.21;3.68) |
| Diseases and disorders of the ear, nose, mouth and throat | Dental diseases and disorders                                                                      | 1.63 (0.44;6.08) | -                 | -                | -                | -                |

|                                                           |                                                                                                       |                  |                   |                   |                   |                     |
|-----------------------------------------------------------|-------------------------------------------------------------------------------------------------------|------------------|-------------------|-------------------|-------------------|---------------------|
| Diseases and disorders of the ear, nose, mouth and throat | Other ear, nose, mouth, throat and cranial/facial conditions                                          | 0.96 (0.66;1.4)  | 2.13 (0.14;33.12) | 2.13 (0.14;33.12) | -                 | 1.06 (0.1;11.38)    |
| Diseases and disorders of the respiratory system          | Major respiratory tract procedures                                                                    | 0.68 (0.07;6.53) | -                 | -                 | -                 | -                   |
| Diseases and disorders of the respiratory system          | Other respiratory system procedures                                                                   | 0.43 (0.22;0.86) | -                 | 0.78 (0.11;5.81)  | 2.35 (0.24;23.47) | 1.04 (0.26;4.12)    |
| Diseases and disorders of the respiratory system          | Respiratory tract diseases with assisted ventilation for more than 96 hours                           | 0.43 (0.21;0.88) | -                 | 0.28 (0.04;1.85)  | -                 | 1.37 (0.34;5.52)    |
| Diseases and disorders of the respiratory system          | Respiratory failure                                                                                   | 0.37 (0.26;0.53) | -                 | 1.1 (0.45;2.68)   | 0.52 (0.17;1.59)  | 1.83 (0.63;5.37)    |
| Diseases and disorders of the respiratory system          | Pulmonary embolism                                                                                    | 1.22 (0.96;1.56) | 1.67 (0.11;26.36) | 0.56 (0.15;2)     | 1 (0.24;4.1)      | 1.48 (0.59;3.72)    |
| Diseases and disorders of the respiratory system          | Major chest trauma                                                                                    | 0.75 (0.55;1.04) | -                 | 1.35 (0.13;14.6)  | 1.35 (0.13;14.6)  | 13.53 (1.62;113.04) |
| Diseases and disorders of the respiratory system          | Respiratory neoplasms                                                                                 | 0.94 (0.76;1.16) | 0.72 (0.08;6.89)  | 0.96 (0.63;1.44)  | -                 | 1.18 (0.69;2.02)    |
| Diseases and disorders of the respiratory system          | Major pulmonary infections and inflammations                                                          | 0.87 (0.75;1.01) | 0.59 (0.07;5.23)  | 0.79 (0.54;1.17)  | 0.78 (0.43;1.44)  | 1.68 (1.25;2.28)    |
| Diseases and disorders of the respiratory system          | Bronchiolitis and respiratory syncytial virus pneumonia                                               | 0.17 (0.02;1.31) | -                 | -                 | -                 | -                   |
| Diseases and disorders of the respiratory system          | Other pneumonia                                                                                       | 0.7 (0.61;0.8)   | 0.73 (0.16;3.43)  | 0.6 (0.34;1.08)   | 0.9 (0.48;1.7)    | 1.86 (1.34;2.6)     |
| Diseases and disorders of the respiratory system          | Chronic obstructive pulmonary disease                                                                 | 0.55 (0.49;0.6)  | 0.71 (0.25;2.07)  | 1.09 (0.68;1.76)  | 0.59 (0.44;0.79)  | 1.2 (0.96;1.51)     |
| Diseases and disorders of the respiratory system          | Asthma                                                                                                | 0.66 (0.5;0.85)  | -                 | -                 | -                 | 1.55 (0.55;4.4)     |
| Diseases and disorders of the respiratory system          | Interstitial and alveolar lung disease                                                                | 1.1 (0.73;1.66)  | -                 | 0.41 (0.09;1.81)  | 0.51 (0.15;1.7)   | 1.39 (0.53;3.69)    |
| Diseases and disorders of the respiratory system          | Other respiratory diseases except minor signs, symptoms and diag, Minor signs, symptoms and diagnoses | 0.92 (0.68;1.25) | 1.1 (0.1;11.96)   | 0.74 (0.15;3.55)  | 0.47 (0.14;1.59)  | 1.23 (0.43;3.51)    |
| Diseases and disorders of the respiratory system          | Other minor diagnoses, signs and symptoms of the respiratory system                                   | 0.83 (0.68;1.02) | 2.45 (0.15;38.8)  | 1.5 (0.64;3.54)   | 0.9 (0.39;2.09)   | 2.45 (0.72;8.3)     |
| Diseases and disorders of the respiratory system          | Acute bronchitis and related symptoms                                                                 | 0.54 (0.44;0.65) | -                 | 0.69 (0.15;3.07)  | 1.26 (0.66;2.43)  | 1.98 (1.01;3.87)    |
| Diseases and disorders of the circulatory system          | Cardiac defibrillator and cardiac assist system implantation                                          | 0.65 (0.28;1.52) | 1.57 (0.17;14.83) | -                 | -                 | -                   |
| Diseases and disorders of the circulatory system          | Other cardiothoracic and thoracic vascular procedures                                                 | -                | -                 | -                 | -                 | -                   |
| Diseases and disorders of the circulatory system          | Heart valve procedures without iam or complex diagnosis                                               | -                | -                 | -                 | -                 | -                   |

|                                                  |                                                                              |                   |                   |                   |                  |                   |
|--------------------------------------------------|------------------------------------------------------------------------------|-------------------|-------------------|-------------------|------------------|-------------------|
| Diseases and disorders of the circulatory system | Other cardiothoracic and thoracic vascular procedures                        | 1.41 (0.77;2.57)  | -                 | -                 | 1.44 (0.1;21.62) | -                 |
| Diseases and disorders of the circulatory system | Major abdominal vascular procedures                                          | 0.44 (0.13;1.52)  | 1.56 (0.24;10.28) | -                 | -                | -                 |
| Diseases and disorders of the circulatory system | Implant, Permanent cardiac pacemaker without iam, heart failure or shock     | 1.02 (0.09;11.24) | -                 | -                 | 2 (0.5;8)        | -                 |
| Diseases and disorders of the circulatory system | Implant, Permanent cardiac pacemaker without iam, cardiac failure or shock   | 0.82 (0.63;1.07)  | 2.14 (0.74;6.16)  | 0.83 (0.09;7.87)  | 0.62 (0.14;2.87) | 3.32 (0.76;14.51) |
| Diseases and disorders of the circulatory system | Percutaneous coronary interventions with iam                                 | 0.81 (0.69;0.95)  | 1.68 (0.6;4.65)   | 1.34 (0.58;3.12)  | 1.44 (0.61;3.38) | 1.64 (0.87;3.08)  |
| Diseases and disorders of the circulatory system | Percutaneous coronary interventions without iam                              | 1.14 (0.96;1.35)  | 2.99 (1.33;6.71)  | 0.3 (0.04;2.47)   | 0.5 (0.19;1.32)  | 0.62 (0.3;1.3)    |
| Diseases and disorders of the circulatory system | Pacemaker generator and cardiac defibrillator replacement                    | 1.7 (0.52;5.57)   | -                 | -                 | -                | -                 |
| Diseases and disorders of the circulatory system | Revision of pacemaker and cardiac defibrillator except generator replacement | 0.58 (0.12;2.8)   | -                 | -                 | -                | 3.5 (0.36;34.33)  |
| Diseases and disorders of the circulatory system | Other circulatory system procedures                                          | 0.71 (0.33;1.51)  | -                 | 0.72 (0.09;5.64)  | -                | -                 |
| Diseases and disorders of the circulatory system | Arterial procedures on lower extremity                                       | 0.82 (0.56;1.21)  | 0.99 (0.2;4.87)   | 0.41 (0.05;3.3)   | 1.24 (0.33;4.68) | 1.06 (0.29;3.87)  |
| Diseases and disorders of the circulatory system | Other peripheral vascular procedures                                         | 0.54 (0.3;0.95)   | -                 | -                 | -                | -                 |
| Diseases and disorders of the circulatory system | Acute myocardial infarction - iam                                            | 0.66 (0.52;0.82)  | -                 | 0.78 (0.27;2.27)  | 0.96 (0.32;2.87) | 1.24 (0.5;3.12)   |
| Diseases and disorders of the circulatory system | Cardiac catheterisation for coronary artery disease                          | 0.9 (0.66;1.23)   | -                 | 2.26 (0.14;35.55) | 0.45 (0.05;3.79) | -                 |
| Diseases and disorders of the circulatory system | Cardiac catheterisation for other non-coronary condition                     | 0.79 (0.64;0.97)  | 0.86 (0.09;8.2)   | 0.52 (0.06;4.38)  | 0.81 (0.3;2.16)  | 1.55 (0.7;3.45)   |
| Diseases and disorders of the circulatory system | Acute and subacute endocarditis                                              | 0.72 (0.36;1.44)  | 2.82 (0.45;17.66) | 2.82 (0.66;11.95) | -                | 0.94 (0.31;2.85)  |
| Diseases and disorders of the circulatory system | Heart failure                                                                | 0.83 (0.76;0.91)  | 0.38 (0.15;0.98)  | 0.79 (0.56;1.11)  | 0.61 (0.42;0.89) | 2.22 (1.69;2.92)  |
| Diseases and disorders of the circulatory system | Cardiac arrest and shock                                                     | 0.73 (0.4;1.35)   | -                 | 0.66 (0.31;1.42)  | -                | 0.98 (0.49;1.98)  |
| Diseases and disorders of the circulatory system | Peripheral vascular disorders and others                                     | 0.83 (0.6;1.16)   | 2.45 (0.16;38.38) | 1.84 (0.67;5.02)  | 0.82 (0.09;7.66) | 1.84 (0.43;7.91)  |
| Diseases and disorders of the circulatory system | Coronary arteriosclerosis and angina pectoris                                | 0.73 (0.54;0.98)  | -                 | -                 | 1.68 (0.41;6.81) | 1.4 (0.13;15.14)  |
| Diseases and disorders of the circulatory system | Hypertension                                                                 | 1.24 (0.89;1.73)  | -                 | -                 | 3.29 (0.3;35.41) | 2.05 (0.58;7.33)  |
| Diseases and disorders of the circulatory system | Trauma craniotomy                                                            | -                 | -                 | -                 | -                | -                 |

|                                                  |                                                                                              |                  |                  |                   |                   |                   |
|--------------------------------------------------|----------------------------------------------------------------------------------------------|------------------|------------------|-------------------|-------------------|-------------------|
| Diseases and disorders of the circulatory system | Congenital heart and valve diseases                                                          | 0.98 (0.49;1.95) | -                | 2.08 (0.14;30.54) | -                 | -                 |
| Diseases and disorders of the circulatory system | Cardiac arrhythmias and conduction disorders                                                 | 0.98 (0.81;1.18) | -                | 0.7 (0.14;3.41)   | 0.7 (0.23;2.13)   | 2.79 (0.63;12.3)  |
| Diseases and disorders of the circulatory system | Thoracic pain                                                                                | 1.02 (0.71;1.46) | -                | -                 | -                 | -                 |
| Diseases and disorders of the circulatory system | Syncope and collapse                                                                         | 1.31 (1;1.73)    | -                | 1.55 (0.1;24.51)  | 1.55 (0.1;24.51)  | -                 |
| Diseases and disorders of the circulatory system | Cardiomyopathy                                                                               | 2.04 (0.72;5.81) | -                | -                 | -                 | -                 |
| Diseases and disorders of the circulatory system | Malfunction, reaction or complication of cardiovascular device or procedure, Cardiovascular, | 0.71 (0.39;1.31) | -                | -                 | -                 | 5.71 (0.56;58.27) |
| Diseases and disorders of the circulatory system | Other circulatory system diagnoses                                                           | 1.09 (0.77;1.54) | -                | 0.75 (0.15;3.73)  | 7.51 (0.86;65.37) | 1.64 (0.63;4.26)  |
| Diseases and disorders of the circulatory system | Craniotomy except for trauma                                                                 | -                | -                | -                 | -                 | -                 |
| Diseases and disorders of the circulatory system | Ventricular shunt procedures                                                                 | -                | -                | -                 | -                 | -                 |
| Diseases and disorders of the digestive system   | Major procedures on stomach, oesophagus and duodenum                                         | 1.02 (0.57;1.83) | 1.25 (0.48;3.24) | 0.67 (0.07;5.94)  | -                 | 1.33 (0.68;2.63)  |
| Diseases and disorders of the digestive system   | Other procedures on stomach, oesophagus and duodenum                                         | 0.2 (0.05;0.87)  | 10 (0.94;105.93) | -                 | -                 | -                 |
| Diseases and disorders of the digestive system   | Other small and large bowel procedures                                                       | 0.85 (0.3;2.41)  | -                | -                 | -                 | -                 |
| Diseases and disorders of the digestive system   | Peritoneal adhesiolysis                                                                      | 0.7 (0.36;1.35)  | 0.97 (0.11;8.48) | -                 | -                 | -                 |
| Diseases and disorders of the digestive system   | Anal procedures                                                                              | 0.89 (0.59;1.33) | -                | -                 | -                 | -                 |
| Diseases and disorders of the digestive system   | Hernia procedures except inguinal, femoral and umbilical hernia procedures                   | 0.76 (0.52;1.12) | 1.01 (0.28;3.58) | 2.69 (0.17;41.78) | -                 | 2.69 (0.39;18.34) |
| Diseases and disorders of the digestive system   | Inguinal, femoral and umbilical hernia procedures                                            | 0.81 (0.55;1.19) | 0.84 (0.18;3.96) | -                 | 0.84 (0.09;7.8)   | -                 |
| Diseases and disorders of the digestive system   | Other digestive tract surgical procedures                                                    | 0.73 (0.4;1.35)  | -                | 0.35 (0.05;2.54)  | -                 | 2.79 (0.95;8.19)  |
| Diseases and disorders of the digestive system   | Spinal procedures                                                                            | -                | -                | -                 | -                 | -                 |
| Diseases and disorders of the digestive system   | Major small bowel procedures                                                                 | 0.71 (0.49;1.02) | 1.5 (0.91;2.46)  | 1.56 (0.67;3.6)   | 0.36 (0.05;2.79)  | 1.29 (0.84;1.99)  |
| Diseases and disorders of the digestive system   | Major large bowel procedures                                                                 | 0.87 (0.58;1.31) | 1.04 (0.5;2.14)  | -                 | -                 | 0.51 (0.21;1.22)  |
| Diseases and disorders of the digestive system   | Gastric fundoplication                                                                       | 0.82 (0.16;4.2)  | -                | -                 | -                 | -                 |

|                                                                 |                                                                                             |                  |                   |                   |                   |                   |
|-----------------------------------------------------------------|---------------------------------------------------------------------------------------------|------------------|-------------------|-------------------|-------------------|-------------------|
| Diseases and disorders of the digestive system                  | Appendectomy with complex principal diagnosis                                               | 0.78 (0.55;1.1)  | 0.58 (0.13;2.59)  | -                 | -                 | -                 |
| Diseases and disorders of the digestive system                  | Appendectomy without complex principal diagnosis                                            | 1.05 (0.85;1.28) | 1.95 (0.28;13.69) | -                 | -                 | -                 |
| Diseases and disorders of the digestive system                  | Extracranial vascular procedures                                                            | -                | -                 | -                 | -                 | -                 |
| Diseases and disorders of the digestive system                  | Digestive malignancy                                                                        | 0.85 (0.67;1.07) | 2.06 (0.71;5.99)  | 1.6 (1.01;2.54)   | -                 | 1.2 (0.71;2.05)   |
| Diseases and disorders of the digestive system                  | Peptic ulcer and gastritis                                                                  | 0.77 (0.59;1.02) | 2.64 (0.17;41.59) | 5.28 (0.49;57.25) | 0.96 (0.32;2.91)  | 10.55 (1.2;92.75) |
| Diseases and disorders of the digestive system                  | Major diseases of the oesophagus                                                            | 1.53 (0.78;2.99) | 1.33 (0.09;19.64) | -                 | -                 | 0.67 (0.07;6.68)  |
| Diseases and disorders of the digestive system                  | Other esophageal diseases                                                                   | 0.5 (0.25;0.99)  | -                 | 4.1 (0.28;60.06)  | -                 | 8.2 (0.82;81.69)  |
| Diseases and disorders of the digestive system                  | Diverticulitis and diverticulosis                                                           | 0.9 (0.69;1.17)  | -                 | -                 | 0.65 (0.14;3.04)  | -                 |
| Diseases and disorders of the digestive system                  | Inflammatory bowel disease                                                                  | 0.63 (0.41;0.96) | -                 | -                 | -                 | 2.17 (0.38;12.32) |
| Diseases and disorders of the digestive system                  | Gastrointestinal vascular insufficiency                                                     | 0.67 (0.46;0.99) | 3.03 (0.19;47.16) | 1.21 (0.41;3.62)  | 1.82 (0.46;7.22)  | -                 |
| Diseases and disorders of the digestive system                  | Gastrointestinal obstruction                                                                | 0.84 (0.67;1.07) | 4.83 (0.44;52.64) | 1.51 (0.51;4.5)   | 0.45 (0.13;1.52)  | 0.69 (0.15;3.26)  |
| Diseases and disorders of the digestive system                  | Major bacterial infections of the digestive tract                                           | 1 (0.75;1.35)    | -                 | 0.81 (0.16;4.08)  | 0.12 (0.02;0.88)  | 1.27 (0.43;3.73)  |
| Diseases and disorders of the digestive system                  | Other gastroenteritis, nausea and vomiting                                                  | 0.77 (0.62;0.94) | 2.66 (0.17;42.23) | 1.33 (0.12;14.55) | 0.76 (0.26;2.27)  | 0.27 (0.03;2.06)  |
| Diseases and disorders of the digestive system                  | Abdominal pain                                                                              | 0.93 (0.75;1.17) | -                 | -                 | 3.28 (0.56;19.36) | -                 |
| Diseases and disorders of the digestive system                  | Malfunction, reaction and complication of gastrointestinal device or proc, Gastrointestinal | 0.8 (0.42;1.53)  | -                 | -                 | 2.54 (0.17;37.64) | 1.27 (0.13;12.83) |
| Diseases and disorders of the digestive system                  | Other non-specific gastrointestinal bleeding                                                | 0.66 (0.52;0.84) | -                 | 1.68 (0.64;4.41)  | 0.27 (0.06;1.11)  | 1.68 (0.64;4.41)  |
| Diseases and disorders of the digestive system                  | Other digestive system diagnoses                                                            | 0.85 (0.71;1.01) | 0.8 (0.16;3.92)   | 1.5 (0.5;4.51)    | 0.16 (0.02;1.2)   | 0.92 (0.33;2.55)  |
| Diseases and disorders of the digestive system                  | Other nervous system and related procedures                                                 | -                | -                 | -                 | -                 | -                 |
| Diseases and disorders of the hepatobiliary system and pancreas | Major pancreas, liver and shunt procedures                                                  | 1.19 (0.47;3.02) | 1.14 (0.25;5.26)  | -                 | -                 | 1.14 (0.25;5.26)  |
| Diseases and disorders of the hepatobiliary system and pancreas | Major biliary tract procedures                                                              | 0.51 (0.17;1.52) | 4 (0.79;20.32)    | -                 | 4 (0.31;51.03)    | 1.33 (0.18;9.66)  |

|                                                                            |                                                                |                  |                  |                  |                  |                  |
|----------------------------------------------------------------------------|----------------------------------------------------------------|------------------|------------------|------------------|------------------|------------------|
| Diseases and disorders of the hepatobiliary system and pancreas            | Cholecystectomy                                                | 0.87 (0.72;1.05) | 1.25 (0.57;2.73) | 1.57 (0.26;9.29) | 0.94 (0.3;2.95)  | 1.45 (0.61;3.42) |
| Diseases and disorders of the hepatobiliary system and pancreas            | Other hepatobiliary, pancreatic and abdominal procedures       | 0.82 (0.32;2.1)  | -                | -                | -                | 0.71 (0.2;2.5)   |
| Diseases and disorders of the hepatobiliary system and pancreas            | Hepatic coma and other major liver disorders                   | 1.06 (0.78;1.44) | -                | 0.38 (0.09;1.7)  | 1.28 (0.7;2.34)  | 0.48 (0.11;2.19) |
| Diseases and disorders of the hepatobiliary system and pancreas            | Alcoholic liver disease                                        | 0.77 (0.54;1.1)  | 5.32 (0.5;57.08) | 1.06 (0.21;5.27) | 0.33 (0.04;2.58) | 1.6 (0.4;6.38)   |
| Diseases and disorders of the hepatobiliary system and pancreas            | Malignant neoplasm of the hepatobiliary system or pancreas     | 0.83 (0.65;1.08) | -                | 0.56 (0.32;1)    | -                | 0.61 (0.31;1.21) |
| Diseases and disorders of the hepatobiliary system and pancreas            | Disorders of the pancreas except malignant neoplasm            | 0.99 (0.81;1.2)  | 1.03 (0.09;11.3) | 1.55 (0.35;6.83) | 0.99 (0.49;1.97) | 2.06 (0.84;5.1)  |
| Diseases and disorders of the hepatobiliary system and pancreas            | Other liver disorders                                          | 0.53 (0.34;0.82) | -                | -                | -                | -                |
| Diseases and disorders of the hepatobiliary system and pancreas            | Biliary tract and gallbladder disorders                        | 1.38 (1.16;1.63) | -                | 1.11 (0.25;4.92) | 0.41 (0.19;0.88) | 1.65 (0.68;3.99) |
| Diseases and disorders of the hepatobiliary system and pancreas            | Other intracranial percutaneous procedures                     | -                | -                | -                | -                | -                |
| Diseases and disorders of the hepatobiliary system and pancreas            | Percutaneous intracranial and extracranial vascular procedures | -                | -                | -                | -                | -                |
| Diseases and disorders of the musculoskeletal system and connective tissue | Hip joint replacement                                          | 0.82 (0.64;1.04) | 2.49 (0.96;6.44) | 0.83 (0.27;2.51) | -                | 2.21 (0.88;5.56) |
| Diseases and disorders of the musculoskeletal system and connective tissue | Knee joint replacement                                         | 0.82 (0.39;1.7)  | 5 (0.51;49.16)   | -                | -                | 2.5 (0.17;36.21) |
| Diseases and disorders of the musculoskeletal system and connective tissue | Dorsal and lumbar scoliosis fusion procedures                  | -                | -                | -                | -                | -                |
| Diseases and disorders of the musculoskeletal system and connective tissue | Dorsal and lumbar fusion procedures except for scoliosis       | 0.41 (0.16;1.07) | -                | -                | -                | -                |

|                                                                            |                                                                                                      |                  |                   |                   |                  |                   |
|----------------------------------------------------------------------------|------------------------------------------------------------------------------------------------------|------------------|-------------------|-------------------|------------------|-------------------|
| Diseases and disorders of the musculoskeletal system and connective tissue | Amputation of lower extremities except toes                                                          | 1.16 (0.68;1.98) | 0.88 (0.18;4.41)  | 1.76 (0.39;7.96)  | -                | 0.7 (0.15;3.32)   |
| Diseases and disorders of the musculoskeletal system and connective tissue | Hip and femur fracture repair                                                                        | 0.8 (0.68;0.95)  | 1.31 (0.7;2.45)   | 2.32 (1.04;5.17)  | 0.63 (0.07;5.63) | 1.64 (0.78;3.44)  |
| Diseases and disorders of the musculoskeletal system and connective tissue | Other significant hip and femur surgery                                                              | 0.83 (0.41;1.67) | -                 | 4.91 (0.49;48.76) | -                | 4.91 (1.05;23.03) |
| Diseases and disorders of the musculoskeletal system and connective tissue | Excision and decompression of intervertebral discs                                                   | 1.22 (0.54;2.8)  | -                 | -                 | -                | -                 |
| Diseases and disorders of the musculoskeletal system and connective tissue | Skin graft diagnoses for musculoskeletal and connective tissue disorders, except hand                | 0.58 (0.12;2.8)  | -                 | -                 | -                | -                 |
| Diseases and disorders of the musculoskeletal system and connective tissue | Knee and lower leg procedures except foot                                                            | 0.7 (0.55;0.88)  | 2.93 (0.42;20.49) | -                 | 3.9 (0.89;17.12) | 0.98 (0.1;9.27)   |
| Diseases and disorders of the musculoskeletal system and connective tissue | Foot and toe procedures                                                                              | 0.79 (0.45;1.38) | -                 | -                 | -                | 2.59 (0.17;39.08) |
| Diseases and disorders of the musculoskeletal system and connective tissue | Shoulder, elbow and forearm procedures exc, Joint replacement                                        | 0.73 (0.51;1.04) | 1.4 (0.13;15.06)  | 1.4 (0.13;15.06)  | -                | 2.8 (0.18;43.82)  |
| Diseases and disorders of the musculoskeletal system and connective tissue | Hand and wrist procedures                                                                            | 1.37 (0.93;2.02) | -                 | -                 | -                | -                 |
| Diseases and disorders of the musculoskeletal system and connective tissue | Tendon, muscle and other soft tissue procedures                                                      | 0.25 (0.1;0.63)  | -                 | -                 | -                | -                 |
| Diseases and disorders of the musculoskeletal system and connective tissue | Other musculoskeletal system and connective tissue procedures                                        | 0.5 (0.29;0.88)  | -                 | -                 | -                | -                 |
| Diseases and disorders of the musculoskeletal system and connective tissue | Cervical spinal fusion and other back/neck proc, Back/neck procedures except excision/decomp, Discal | -                | -                 | -                 | -                | -                 |
| Diseases and disorders of the musculoskeletal system and connective tissue | Shoulder and elbow replacement                                                                       | 2.04 (0.41;10.1) | -                 | -                 | -                | -                 |
| Diseases and disorders of the musculoskeletal system and connective tissue | Femur fractures                                                                                      | 0.57 (0.25;1.32) | -                 | -                 | -                | -                 |

|                                                                            |                                                                                         |                  |                   |                   |                   |                   |
|----------------------------------------------------------------------------|-----------------------------------------------------------------------------------------|------------------|-------------------|-------------------|-------------------|-------------------|
| Diseases and disorders of the musculoskeletal system and connective tissue | Pelvis fracture or hip dislocation                                                      | 0.96 (0.58;1.57) | -                 | -                 | -                 | -                 |
| Diseases and disorders of the musculoskeletal system and connective tissue | Fracture or dislocation except femur, pelvis or back                                    | 0.91 (0.68;1.22) | -                 | -                 | 2.23 (0.14;35.12) | -                 |
| Diseases and disorders of the musculoskeletal system and connective tissue | Pathological fractures and malignant musculoskeletal and connective tissue neoplasm     | 0.95 (0.6;1.5)   | 0.72 (0.08;6.57)  | 0.64 (0.19;2.15)  | -                 | 2.15 (0.58;7.95)  |
| Diseases and disorders of the musculoskeletal system and connective tissue | Osteomyelitis, septic arthritis and other musculoskeletal infections                    | 0.62 (0.3;1.25)  | -                 | -                 | 3.3 (0.23;48.13)  | -                 |
| Diseases and disorders of the musculoskeletal system and connective tissue | Connective tissue disorders                                                             | 1.1 (0.69;1.76)  | 1.85 (0.12;28.45) | 0.46 (0.05;3.94)  | 3.7 (0.35;39.01)  | 0.21 (0.03;1.54)  |
| Diseases and disorders of the musculoskeletal system and connective tissue | Other back and neck problems, fractures and injuries                                    | 0.57 (0.4;0.82)  | -                 | 1.79 (0.17;19.21) | 3.58 (0.23;55.9)  | -                 |
| Diseases and disorders of the musculoskeletal system and connective tissue | Malfunction, reaction or complication of an orthopaedic device or procedure, Orthopedic | 0.4 (0.23;0.69)  | -                 | -                 | 1.71 (0.19;15.36) | -                 |
| Diseases and disorders of the musculoskeletal system and connective tissue | Other musculoskeletal system and connective tissue diagnoses                            | 1.1 (0.84;1.46)  | 1.85 (0.12;29.11) | 0.92 (0.09;10.02) | 1.85 (0.47;7.18)  | 0.62 (0.07;5.82)  |
| Skin, subcutaneous tissue and breast diseases and disorders                | Skin grafting for skin and subcutaneous tissue diagnostics                              | 0.37 (0.16;0.82) | -                 | -                 | 2.79 (0.29;26.74) | 2.79 (0.29;26.74) |
| Skin, subcutaneous tissue and breast diseases and disorders                | Mastectomy procedures                                                                   | -                | -                 | -                 | -                 | -                 |
| Skin, subcutaneous tissue and breast diseases and disorders                | Breast procedures except mastectomy                                                     | 2.04 (0.81;5.14) | -                 | -                 | -                 | -                 |
| Skin, subcutaneous tissue and breast diseases and disorders                | Other skin, subcutaneous tissue and related procedures                                  | 0.78 (0.45;1.34) | -                 | -                 | 2.61 (0.17;39.56) | -                 |
| Skin, subcutaneous tissue and breast diseases and disorders                | Skin ulcers                                                                             | 0.69 (0.47;1.02) | -                 | 2.35 (0.67;8.26)  | 1.18 (0.24;5.79)  | 1.47 (0.28;7.67)  |
| Skin, subcutaneous tissue and breast diseases and disorders                | Major skin disorders                                                                    | 2.62 (0.98;7.04) | -                 | -                 | -                 | -                 |
| Skin, subcutaneous tissue and breast diseases and disorders                | Malignant diseases of the breast                                                        | 0.84 (0.35;2.02) | -                 | 0.61 (0.08;4.52)  | -                 | 4.86 (0.52;45.32) |
| Skin, subcutaneous tissue and breast diseases and disorders                | Cellulitis and other skin infections                                                    | 0.74 (0.58;0.93) | 0.92 (0.1;8.77)   | 8.31 (0.88;78.96) | 0.58 (0.2;1.67)   | 1.58 (0.47;5.29)  |
| Skin, subcutaneous tissue and breast diseases and disorders                | Trauma to skin, subcutaneous tissue and open wounds                                     | 0.9 (0.65;1.26)  | -                 | -                 | -                 | 6.76 (0.72;63.48) |

|                                                             |                                                                         |                   |                   |                  |                  |                   |
|-------------------------------------------------------------|-------------------------------------------------------------------------|-------------------|-------------------|------------------|------------------|-------------------|
| Skin, subcutaneous tissue and breast diseases and disorders | Other skin, subcutaneous tissue and breast diseases                     | 1 (0.6;1.66)      | -                 | -                | -                | -                 |
| Endocrine, nutritional and metabolic diseases and disorders | Tracheostomy with vm 96+ hours with extensive procedure                 | -                 | -                 | -                | -                | -                 |
| Endocrine, nutritional and metabolic diseases and disorders | Spinal disorders and injuries                                           | -                 | -                 | -                | -                | -                 |
| Endocrine, nutritional and metabolic diseases and disorders | Adrenal gland procedures                                                | -                 | -                 | -                | -                | -                 |
| Endocrine, nutritional and metabolic diseases and disorders | Surgical procedures for obesity                                         | -                 | -                 | -                | -                | -                 |
| Endocrine, nutritional and metabolic diseases and disorders | Thyroid, parathyroid and thyroglossal tract procedures                  | 0.51 (0.06;4.56)  | -                 | -                | -                | -                 |
| Endocrine, nutritional and metabolic diseases and disorders | Other endocrine, nutritional and metabolic procedures                   | 2.04 (0.29;14.48) | -                 | -                | -                | -                 |
| Endocrine, nutritional and metabolic diseases and disorders | Degenerative disorders of the nervous system, except multiple sclerosis | -                 | -                 | -                | -                | -                 |
| Endocrine, nutritional and metabolic diseases and disorders | Diabetes                                                                | 1.16 (0.91;1.48)  | 3.52 (0.32;38.34) | 0.59 (0.06;5.57) | 0.25 (0.03;2.01) | 2.2 (0.6;8.01)    |
| Endocrine, nutritional and metabolic diseases and disorders | Malnutrition, failure to thrive and other nutritional diseases          | 1.36 (0.75;2.47)  | -                 | -                | -                | -                 |
| Endocrine, nutritional and metabolic diseases and disorders | Hypovolaemia and related electrolyte disorders                          | 1.22 (0.65;2.32)  | -                 | 3.33 (0.33;33.7) | -                | -                 |
| Endocrine, nutritional and metabolic diseases and disorders | Congenital metabolic disorders                                          | 1.36 (0.23;8.14)  | -                 | -                | -                | 1.5 (0.18;12.46)  |
| Endocrine, nutritional and metabolic diseases and disorders | Other endocrine disorders                                               | 0.65 (0.28;1.52)  | -                 | -                | -                | 3.14 (0.22;43.96) |
| Endocrine, nutritional and metabolic diseases and disorders | Other non-hypovolaemic electrolyte disorders                            | 1.41 (0.97;2.06)  | -                 | -                | 0.72 (0.07;7.73) | 1.44 (0.09;22.5)  |

|                                                             |                                                                         |                   |                   |                   |                  |                   |
|-------------------------------------------------------------|-------------------------------------------------------------------------|-------------------|-------------------|-------------------|------------------|-------------------|
| Endocrine, nutritional and metabolic diseases and disorders | Non-hypovolemic sodium disorders                                        | 1.2 (0.81;1.79)   | -                 | -                 | 0.68 (0.14;3.32) | -                 |
| Endocrine, nutritional and metabolic diseases and disorders | Thyroid disorders                                                       | 1.22 (0.29;5.12)  | -                 | -                 | -                | -                 |
| Kidney and urinary tract diseases and disorders             | Intracranial haemorrhage                                                | -                 | -                 | -                 | -                | -                 |
| Kidney and urinary tract diseases and disorders             | Renal transplantation                                                   | 0.64 (0.47;0.87)  | 0.95 (0.52;1.72)  | -                 | 1 (0.38;2.59)    | 2.65 (0.84;8.36)  |
| Kidney and urinary tract diseases and disorders             | Major bladder procedures                                                | 0.41 (0.05;3.49)  | -                 | -                 | -                | -                 |
| Kidney and urinary tract diseases and disorders             | Kidney and urinary tract procedures for neoplasia                       | 10.2 (1.19;87.28) | -                 | -                 | -                | -                 |
| Kidney and urinary tract diseases and disorders             | Kidney and urinary tract procedures for non-malignant processes         | 0.81 (0.6;1.1)    | 0.36 (0.05;2.85)  | 1.67 (0.29;9.76)  | 2.51 (0.36;17.4) | 0.68 (0.2;2.37)   |
| Kidney and urinary tract diseases and disorders             | Repair of access device and vessels for renal dialysis                  | 3.06 (0.51;18.31) | -                 | -                 | -                | -                 |
| Kidney and urinary tract diseases and disorders             | Other bladder procedures                                                | 1.43 (0.54;3.75)  | -                 | -                 | -                | 1.43 (0.11;19.2)  |
| Kidney and urinary tract diseases and disorders             | Urethral and transurethral procedures                                   | 0.96 (0.52;1.77)  | -                 | -                 | -                | 2.13 (0.14;31.84) |
| Kidney and urinary tract diseases and disorders             | Other kidney and urinary tract and related procedures                   | -                 | -                 | -                 | -                | -                 |
| Kidney and urinary tract diseases and disorders             | Stroke and precerebral occlusions with infarction                       | -                 | -                 | -                 | -                | -                 |
| Kidney and urinary tract diseases and disorders             | Non-specific ACVA and precerebral occlusions without infarction         | -                 | -                 | -                 | -                | -                 |
| Kidney and urinary tract diseases and disorders             | Neoplasms of the kidney and urinary tract                               | 0.94 (0.57;1.54)  | -                 | 1.3 (0.54;3.16)   | -                | 0.87 (0.18;4.15)  |
| Kidney and urinary tract diseases and disorders             | Nephritis and nephrosis                                                 | 0.78 (0.28;2.2)   | -                 | -                 | -                | -                 |
| Kidney and urinary tract diseases and disorders             | Kidney and urinary tract infections                                     | 0.95 (0.85;1.07)  | 0.31 (0.04;2.47)  | 1.57 (0.73;3.38)  | 0.65 (0.36;1.17) | 1.51 (0.82;2.79)  |
| Kidney and urinary tract diseases and disorders             | Urinary calculi and acquired upper urinary tract obstruction            | 0.88 (0.63;1.24)  | -                 | -                 | 1.16 (0.22;6.1)  | -                 |
| Kidney and urinary tract diseases and disorders             | Malfunction, reaction or complication of genitourinary surgical devices | 0.67 (0.38;1.17)  | -                 | -                 | 0.77 (0.18;3.24) | 6.13 (0.59;63.16) |
| Kidney and urinary tract diseases and disorders             | Other kidney and urinary tract diagnoses, signs and symptoms            | 0.96 (0.71;1.29)  | -                 | 2.13 (0.14;33.46) | 0.64 (0.18;2.24) | -                 |
| Kidney and urinary tract diseases and disorders             | Acute kidney damage                                                     | 0.99 (0.82;1.2)   | 6.19 (0.65;59.06) | 1.43 (0.62;3.27)  | 0.85 (0.36;2.01) | 1.81 (0.67;4.89)  |

|                                                          |                                                                                                  |                   |                   |                  |                   |                  |
|----------------------------------------------------------|--------------------------------------------------------------------------------------------------|-------------------|-------------------|------------------|-------------------|------------------|
| Kidney and urinary tract diseases and disorders          | Chronic kidney disease                                                                           | -                 | -                 | -                | -                 | -                |
| Kidney and urinary tract diseases and disorders          | Cranial, peripheral and autonomic nerve disorders                                                | 0.72 (0.48;1.08)  | -                 | -                | 2.84 (0.18;44.03) | -                |
| Diseases and disorders of the male reproductive system   | Major procedures on male pelvis                                                                  | 2.04 (0.29;14.48) | -                 | -                | -                 | -                |
| Diseases and disorders of the male reproductive system   | Transurethral prostatectomy                                                                      | -                 | -                 | -                | -                 | -                |
| Diseases and disorders of the male reproductive system   | Penile, testicular and scrotal procedures                                                        | 0.95 (0.49;1.83)  | -                 | -                | -                 | -                |
| Diseases and disorders of the male reproductive system   | Other surgical proc, Surgical procedures of male genital ap, Male genital surgery                | 1.22 (0.29;5.12)  | 1.67 (0.16;17.89) | -                | -                 | 3.33 (0.49;22.9) |
| Diseases and disorders of the male reproductive system   | Bacterial and tuberculous infections of the nervous system                                       | -                 | -                 | -                | -                 | -                |
| Diseases and disorders of the male reproductive system   | Non-bacterial infections of the nervous system except viral meningitis                           | -                 | -                 | -                | -                 | -                |
| Diseases and disorders of the male reproductive system   | Neoplasms of the male genital tract                                                              | 1.59 (0.79;3.19)  | -                 | 0.96 (0.26;3.62) | -                 | 1.29 (0.3;5.43)  |
| Diseases and disorders of the male reproductive system   | Diagnoses of male genital tract except neoplasm                                                  | 1.18 (0.95;1.46)  | -                 | 0.87 (0.08;9.46) | 0.94 (0.36;2.49)  | 1.73 (0.57;5.26) |
| Diseases and disorders of the female reproductive system | Pelvic evisceration, radical hysterectomy and other radical gynaecological procedures            | -                 | -                 | -                | -                 | -                |
| Diseases and disorders of the female reproductive system | Proc, On the uterus and adnexa due to malignant ovarian or adnexal neoplasia                     | 4.08 (0.37;44.98) | -                 | -                | -                 | -                |
| Diseases and disorders of the female reproductive system | Proc, On the uterus and adnexa for malignant neoplasm other than ovarian or adnexal malignancies | -                 | -                 | -                | -                 | -                |
| Diseases and disorders of the female reproductive system | Procedures on uterus and adnexa non-malignant process, except leiomyoma                          | 1.31 (0.82;2.1)   | -                 | -                | -                 | -                |
| Diseases and disorders of the female reproductive system | Proc, Reconstruction of the female genital tract                                                 | -                 | -                 | -                | -                 | -                |
| Diseases and disorders of the female reproductive system | Dilatation and curettage for non-obstetric diagnosis                                             | -                 | -                 | -                | -                 | -                |
| Diseases and disorders of the female reproductive system | Other surgical procedures on female genital tract                                                | 0.64 (0.26;1.61)  | -                 | -                | -                 | -                |
| Diseases and disorders of the female reproductive system | Procedures on uterus and appendages for leiomyoma                                                | 1.36 (0.23;8.14)  | -                 | -                | -                 | -                |
| Diseases and disorders of the female reproductive system | Alteration of consciousness                                                                      | -                 | -                 | -                | -                 | -                |
| Diseases and disorders of the female reproductive system | Convulsions                                                                                      | -                 | -                 | -                | -                 | -                |
| Diseases and disorders of the female reproductive system | Malignant disorders of the female reproductive system                                            | 1.55 (0.85;2.81)  | -                 | 0.66 (0.19;2.3)  | -                 | 1.05 (0.33;3.4)  |

|                                                                                     |                                                                                                       |                  |   |   |   |   |
|-------------------------------------------------------------------------------------|-------------------------------------------------------------------------------------------------------|------------------|---|---|---|---|
| Diseases and disorders of the female reproductive system                            | Infections of the female reproductive system                                                          | 0.61 (0.35;1.05) | - | - | - | - |
| Diseases and disorders of the female reproductive system                            | Other menstrual and female reproductive system diseases                                               | -                | - | - | - | - |
| Diseases and disorders of the blood, the hematopoietic system and the immune system | Migraine and other headaches                                                                          | -                | - | - | - | - |
| Diseases and disorders of the blood, the hematopoietic system and the immune system | Head injury with coma >1h or haemorrhage                                                              | -                | - | - | - | - |
| Diseases and disorders of the blood, the hematopoietic system and the immune system | Skull fracture and complicated intracranial injury, coma < 1h or without coma                         | -                | - | - | - | - |
| Diseases and disorders of the blood, the hematopoietic system and the immune system | Other antepartum diagnoses                                                                            | -                | - | - | - | - |
| Diseases and disorders of the blood, the hematopoietic system and the immune system | Concussion, closed skull fracture neon, uncomplicated intracranial injury, coma <1 hr or without coma | -                | - | - | - | - |
| Diseases and disorders of the blood, the hematopoietic system and the immune system | Other diseases of the nervous system                                                                  | -                | - | - | - | - |
| Diseases and disorders of the blood, the hematopoietic system and the immune system | Anoxia and other severe brain damage                                                                  | -                | - | - | - | - |
| Diseases and disorders of the blood, the hematopoietic system and the immune system | Splenectomy                                                                                           | -                | - | - | - | - |
| Diseases and disorders of the blood, the hematopoietic system and the immune system | Other haematological and haematopoietic organ procedures                                              | 0.68 (0.14;3.37) | - | - | - | - |
| Diseases and disorders of the blood, the hematopoietic system and the immune system | Major haematological/immunological diag except sickle cell and coagulation crises                     | 0.83 (0.52;1.33) | - | - | - | - |
| Diseases and disorders of the blood, the hematopoietic system and the immune system | Coagulation and platelet disorders                                                                    | 1.12 (0.54;2.34) | - | - | - | - |
| Diseases and disorders of the blood, the hematopoietic system and the immune system | Sickle cell disease crises                                                                            | 0.94 (0.36;2.48) | - | - | - | - |

|                                                                                     |                                                                                    |                  |                   |                   |                   |                  |
|-------------------------------------------------------------------------------------|------------------------------------------------------------------------------------|------------------|-------------------|-------------------|-------------------|------------------|
| Diseases and disorders of the blood, the hematopoietic system and the immune system | Other anaemia and haematological and haematopoietic organ disorders                | 1.32 (1.11;1.57) | 0.51 (0.05;4.91)  | -                 | 0.77 (0.24;2.53)  | 0.77 (0.24;2.53) |
| Myeloproliferative diseases and disorders and poorly differentiated neoplasms       | Major surgical procedure for lymphatic/hematopoietic/other neoplasms               | 2.04 (0.13;32.6) | -                 | -                 | -                 | -                |
| Myeloproliferative diseases and disorders and poorly differentiated neoplasms       | Other surgical procedure for lymphatic/hematopoietic/other neoplasms               | 0.68 (0.33;1.39) | 0.6 (0.08;4.54)   | 1 (0.12;8.56)     | -                 | 0.38 (0.05;2.64) |
| Myeloproliferative diseases and disorders and poorly differentiated neoplasms       | Acute leukemia                                                                     | 1.4 (0.81;2.41)  | -                 | 1.09 (0.27;4.4)   | -                 | 1.82 (0.55;6.02) |
| Myeloproliferative diseases and disorders and poorly differentiated neoplasms       | Lymphoma, myeloma and non-acute leukemia                                           | 0.66 (0.47;0.92) | -                 | 1.62 (0.84;3.1)   | -                 | 1.76 (0.79;3.94) |
| Myeloproliferative diseases and disorders and poorly differentiated neoplasms       | Radiotherapy                                                                       | -                | -                 | -                 | -                 | -                |
| Myeloproliferative diseases and disorders and poorly differentiated neoplasms       | Lymphoid and other neoplasms and neoplasms of questionable behaviour               | 1.08 (0.68;1.7)  | -                 | 0.63 (0.14;2.92)  | -                 | 2.21 (0.82;5.94) |
| Myeloproliferative diseases and disorders and poorly differentiated neoplasms       | Chemotherapy for acute leukaemia                                                   | -                | -                 | -                 | -                 | -                |
| Myeloproliferative diseases and disorders and poorly differentiated neoplasms       | Other chemotherapy                                                                 | -                | -                 | -                 | -                 | -                |
| Infectious and parasitic diseases (systemic or unspecified involvement)             | Infectious diseases and parasitosis including hiv with surgical procedure          | 0.94 (0.6;1.46)  | 1.09 (0.49;2.4)   | 2 (1.01;3.96)     | 2.18 (0.14;33.59) | 1.12 (0.79;1.59) |
| Infectious and parasitic diseases (systemic or unspecified involvement)             | Post-operative, post-traumatic and other device infections with surgical procedure | 1.33 (0.66;2.66) | 3.08 (0.31;30.59) | -                 | -                 | -                |
| Infectious and parasitic diseases (systemic or unspecified involvement)             | Septicaemia and disseminated infections                                            | 0.77 (0.64;0.94) | 1.5 (0.45;5.06)   | 1.26 (0.89;1.79)  | 1.18 (0.55;2.54)  | 1.02 (0.77;1.35) |
| Infectious and parasitic diseases (systemic or unspecified involvement)             | Post-operative, post-traumatic and other device infections                         | 0.74 (0.49;1.11) | 1.38 (0.13;14.65) | 2.75 (0.18;42.68) | 1.83 (0.32;10.48) | -                |
| Infectious and parasitic diseases (systemic or unspecified involvement)             | Fever                                                                              | 0.99 (0.73;1.35) | -                 | -                 | 1.71 (0.54;5.37)  | -                |

|                                                                         |                                                                                                                            |                  |                   |                   |                   |                   |
|-------------------------------------------------------------------------|----------------------------------------------------------------------------------------------------------------------------|------------------|-------------------|-------------------|-------------------|-------------------|
| Infectious and parasitic diseases (systemic or unspecified involvement) | Viral disease                                                                                                              | 0.9 (0.49;1.65)  | -                 | -                 | -                 | -                 |
| Infectious and parasitic diseases (systemic or unspecified involvement) | Other systemic infections and parasitosis                                                                                  | 0.76 (0.55;1.05) | -                 | 1.79 (0.31;10.38) | 2.35 (0.9;6.13)   | 0.67 (0.2;2.28)   |
| Mental illnesses or disorders                                           | Eye and orbit procedures                                                                                                   | -                | -                 | -                 | -                 | -                 |
| Mental illnesses or disorders                                           | Diagnosis of mental illness with surgical procedure                                                                        | 0.41 (0.05;3.49) | -                 | -                 | -                 | -                 |
| Mental illnesses or disorders                                           | Schizophrenia                                                                                                              | 1.07 (0.92;1.25) | -                 | -                 | -                 | 0.38 (0.08;1.73)  |
| Mental illnesses or disorders                                           | Major depressive disorders and other/unspecified psychoses                                                                 | 1.07 (0.9;1.27)  | -                 | -                 | -                 | 0.95 (0.29;3.13)  |
| Mental illnesses or disorders                                           | Personality and impulse control disorders                                                                                  | 0.64 (0.43;0.95) | -                 | -                 | -                 | -                 |
| Mental illnesses or disorders                                           | Bipolar disorders                                                                                                          | 0.92 (0.76;1.12) | -                 | -                 | -                 | 0.95 (0.25;3.61)  |
| Mental illnesses or disorders                                           | Depression except major depressive disorder                                                                                | 0.79 (0.48;1.29) | -                 | -                 | -                 | -                 |
| Mental illnesses or disorders                                           | Adjustment disorders and neuroses except depressive diagnoses                                                              | 0.98 (0.66;1.46) | -                 | -                 | -                 | -                 |
| Mental illnesses or disorders                                           | Acute anxiety states and delirium                                                                                          | 1.12 (0.91;1.38) | 1.81 (0.11;28.76) | 2.72 (0.46;16.08) | 0.26 (0.03;2.08)  | 1.81 (0.26;12.73) |
| Mental illnesses or disorders                                           | Organic mental health disorders                                                                                            | 1.09 (0.77;1.54) | -                 | 0.94 (0.09;10.08) | 0.63 (0.07;5.85)  | -                 |
| Mental illnesses or disorders                                           | Behavioural disorders                                                                                                      | 0.86 (0.43;1.75) | -                 | -                 | -                 | -                 |
| Mental illnesses or disorders                                           | Eating disorders                                                                                                           | 1.53 (0.34;6.83) | -                 | -                 | -                 | -                 |
| Mental illnesses or disorders                                           | Other mental health disorders                                                                                              | 0.85 (0.53;1.35) | -                 | -                 | 2.4 (0.16;36.88)  | -                 |
| Alcohol/drug use and alcohol/drug-induced organic mental disorders      | Drug and alcohol abuse or dependence, voluntary discharge                                                                  | -                | -                 | -                 | -                 | -                 |
| Alcohol/drug use and alcohol/drug-induced organic mental disorders      | Drug and alcohol abuse or dependence with rehabilitation or combined rehab/detox treatment, Rehab/detoxification treatment | 0.54 (0.33;0.88) | -                 | -                 | -                 | -                 |
| Alcohol/drug use and alcohol/drug-induced organic mental disorders      | Opiate abuse or dependence                                                                                                 | 0.43 (0.23;0.83) | -                 | -                 | -                 | -                 |
| Alcohol/drug use and alcohol/drug-induced organic mental disorders      | Cocaine abuse or dependence                                                                                                | 0.55 (0.36;0.84) | -                 | -                 | -                 | -                 |
| Alcohol/drug use and alcohol/drug-induced organic mental disorders      | Alcohol abuse or dependence                                                                                                | 1.08 (0.75;1.54) | -                 | -                 | 3.78 (0.35;40.62) | 1.89 (0.28;12.99) |

|                                                                           |                                                                                  |                   |                |                   |                   |                   |
|---------------------------------------------------------------------------|----------------------------------------------------------------------------------|-------------------|----------------|-------------------|-------------------|-------------------|
| Alcohol/drug use and alcohol/drug-induced organic mental disorders        | Other drug abuse or dependence                                                   | 0.94 (0.53;1.66)  | -              | -                 | -                 | -                 |
| Injuries, poisonings and toxic effects of drugs                           | Extensive surgical procedure for other treatment complications                   | 0.19 (0.02;1.44)  | 11 (1.7;71.28) | -                 | -                 | -                 |
| Injuries, poisonings and toxic effects of drugs                           | Moderately extensive surgical procedure for other treatment complications        | 0.71 (0.32;1.59)  | -              | -                 | -                 | 2.88 (0.2;40.8)   |
| Injuries, poisonings and toxic effects of drugs                           | Non-extensive surgical procedure for other treatment complications               | 0.45 (0.1;2.1)    | -              | -                 | -                 | -                 |
| Injuries, poisonings and toxic effects of drugs                           | Haemorrhage or haematoma due to complication                                     | 0.64 (0.34;1.23)  | -              | -                 | -                 | -                 |
| Injuries, poisonings and toxic effects of drugs                           | Allergic reactions                                                               | 0.68 (0.27;1.71)  | -              | -                 | -                 | 6 (0.65;55)       |
| Injuries, poisonings and toxic effects of drugs                           | Poisoning by medicinal agents                                                    | 1.18 (0.85;1.66)  | -              | 1.15 (0.2;6.66)   | 0.57 (0.06;5.38)  | 2.07 (0.66;6.45)  |
| Injuries, poisonings and toxic effects of drugs                           | Other complications of treatment                                                 | 1.25 (0.79;1.97)  | -              | -                 | 2.18 (0.52;9.07)  | -                 |
| Injuries, poisonings and toxic effects of drugs                           | Other diagnoses of injury, poisoning and toxic effect                            | 0.89 (0.5;1.57)   | -              | 1.15 (0.23;5.68)  | -                 | 0.46 (0.06;3.64)  |
| Injuries, poisonings and toxic effects of drugs                           | Toxic effects of non-medicinal substances                                        | 1.42 (0.83;2.42)  | -              | 1.43 (0.09;21.79) | -                 | 0.96 (0.17;5.28)  |
| Injuries, poisonings and toxic effects of drugs                           | Overdosis                                                                        | 1.68 (1.02;2.77)  | -              | -                 | -                 | 1.82 (0.33;10.15) |
| Injuries, poisonings and toxic effects of drugs                           | Infections and other eye diseases                                                | -                 | -              | -                 | -                 | -                 |
| Burns                                                                     | Partial thickness burns without skin grafting                                    | 4.08 (0.37;44.98) | -              | -                 | -                 | -                 |
| Factors influencing health status and other contacts with health services | Procedure with diag, Rehab, aftercare or other contact with health care services | 0.56 (0.23;1.37)  | -              | -                 | -                 | -                 |
| Factors influencing health status and other contacts with health services | Rehabilitation                                                                   | 0.97 (0.58;1.64)  | -              | -                 | 2.1 (0.14;31.89)  | 0.7 (0.08;6.32)   |
| Factors influencing health status and other contacts with health services | Signs, symptoms and other factors affecting health status                        | 1.17 (0.8;1.71)   | -              | -                 | -                 | -                 |
| Factors influencing health status and other contacts with health services | Other aftercare and convalescence                                                | 0.9 (0.62;1.32)   | -              | 0.45 (0.05;3.74)  | 4.53 (0.42;48.42) | 0.57 (0.07;4.9)   |
| HIV infections                                                            | HIV with multiple major HIV-related conditions                                   | 0.65 (0.28;1.52)  | -              | -                 | -                 | 2.24 (1.04;4.85)  |
| HIV infections                                                            | HIV with major HIV-related conditions                                            | 0.5 (0.24;1.03)   | -              | -                 | -                 | -                 |

|                  |                                                                                                    |                  |                |                  |                   |                   |
|------------------|----------------------------------------------------------------------------------------------------|------------------|----------------|------------------|-------------------|-------------------|
| HIV infections   | HIV with multiple major significant HIV-related conditions                                         | -                | -              | -                | -                 | -                 |
| HIV infections   | HIV with one significant HIV-related condition or no significant HIV-related condition             | 0.98 (0.49;1.95) | -              | -                | -                 | -                 |
| Major polytrauma | Other major head and neck procedures                                                               | -                | -              | -                | -                 | -                 |
| Major polytrauma | Craniotomy for significant multiple trauma                                                         | -                | -              | -                | -                 | -                 |
| Major polytrauma | Extensive abdominal/thoracic procedures for significant multiple trauma                            | 1.36 (0.48;3.82) | 3 (0.34;26.19) | -                | -                 | 0.75 (0.3;1.89)   |
| Major polytrauma | Musculoskeletal and other procedures for significant multiple trauma                               | 0.33 (0.11;0.94) | -              | -                | -                 | -                 |
| Major polytrauma | Facial bone procedures except major cranial/facial bone proc, Major cranial/facial bone procedures | -                | -              | -                | -                 | -                 |
| Major polytrauma | Multiple significant trauma without surgical procedure                                             | 0.88 (0.51;1.51) | -              | 0.77 (0.09;6.96) | -                 | 3.47 (0.63;19.14) |
| Invalid category | Extensive procedure unrelated to principal diagnosis                                               | 0.48 (0.22;1.04) | 1.7 (0.4;7.23) | -                | 1.06 (0.14;8.27)  | -                 |
| Invalid category | Moderately extensive procedure unrelated to principal diagnosis                                    | 0.38 (0.17;0.84) | -              | -                | 1.36 (0.18;10.41) | 1.55 (0.4;5.98)   |
| Invalid category | Non-extensive procedure unrelated to principal diagnosis                                           | 0.39 (0.15;1.02) | -              | -                | -                 | 5.2 (0.94;28.76)  |
